# Supplementary material for: A pan‐cancer atlas of cancer hallmark‐associated candidate driver lncRNAs
Source: PubMed Central journal article supplement (PMC6210054; doi:10.1002/1878-0261.12381), 2018-10-02

## Supplementary Tables

Table S1 The detailed information of patients analyzed in manuscript.

| Cancer type                           | Abrr | Gene expression from TCGA Sizes | Copy number variation from TCGA Sizes | LncRNA expression from TANRIC Sizes | Clinical data from cBioPortal Sizes |
|---------------------------------------|------|---------------------------------|---------------------------------------|-------------------------------------|-------------------------------------|
| Stomach adenocarcinoma                | STAD | 415                             | 441                                   | 285                                 | 443                                 |
| Prostate adenocarcinoma               | PRAD | 297                             | 331                                   | 374                                 | 499                                 |
| Skin cutaneous melanoma               | SKCM | 254                             | 469                                   | 226                                 | 478                                 |
| Brain lower grade glioma              | LGG  | 469                             | 463                                   | 486                                 | 530                                 |
| Breast invasive carcinoma             | BRCA | 1102                            | 1080                                  | 837                                 | 1105                                |
| Ovarian serous cystadenocarcinoma     | OV   | 266                             | 572                                   | 412                                 | 607                                 |
| Lung squamous cell carcinoma          | LUAD | 490                             | 494                                   | 488                                 | 522                                 |
| Lung adenocarcinoma                   | LUSC | 490                             | 490                                   | 220                                 | 504                                 |
| Head and neck squamous cell carcinoma | HNSC | 451                             | 452                                   | 426                                 | 530                                 |
| Glioblastoma multiforme               | GBM  | 169                             | 535                                   | 154                                 | 607                                 |
| Colon adenocarcinoma                  | COAD | 192                             | 429                                   | 157                                 | 453                                 |
| Rectal adenocarcinoma                 | READ | 72                              | 162                                   | 71                                  | 162                                 |

(As described in previously TCGA studies, COAD and READ were merged and formed one cancer sample set COAD/READ (CR) in subsequent analysis.)

Table S2. The number of copy number altered PCGs and lncRNAs across cancers.

| Cancer Type | PCG(amp) | PCG(del) | lncRNA(amp) | lncRNA(del) |
|-------------|----------|----------|-------------|-------------|
| BRCA        | 1914     | 211      | 293         | 20          |
| GBM         | 99       | 15       | 25          | 9           |
| HNSC        | 945      | 168      | 145         | 19          |
| LUAD        | 1760     | 428      | 267         | 51          |
| LUSC        | 1613     | 170      | 283         | 33          |
| PRAD        | 104      | 969      | 35          | 210         |
| LGG         | 507      | 421      | 134         | 125         |
| STAD        | 1236     | 156      | 147         | 13          |

|      |      |     |     |    |
|------|------|-----|-----|----|
| CR   | 545  | 141 | 34  | 8  |
| SKCM | 775  | 190 | 135 | 29 |
| OV   | 3075 | 228 | 496 | 29 |

amp, amplification; del, deletion

Table S3 The number of mutually exclusive modules and driver lncRNAs across cancers.

| Abbreviation | Sample sizes | Candidate lncRNA number | Driver lncRNA number | Module number |
|--------------|--------------|-------------------------|----------------------|---------------|
| STAD         | 441          | 160                     | 7                    | 15            |
| PRAD         | 331          | 245                     | 45                   | 60            |
| SKCM         | 469          | 164                     | 2                    | 6             |
| LGG          | 463          | 259                     | 41                   | 35            |
| BRCA         | 1080         | 313                     | 88                   | 282           |
| OV           | 572          | 525                     | 133                  | 1547          |
| LUAD         | 494          | 318                     | 69                   | 379           |
| LUSC         | 490          | 316                     | 48                   | 97            |
| HNSC         | 452          | 164                     | 27                   | 55            |
| GBM          | 535          | 34                      | 14                   | 54            |
| CR           | 591          | 42                      | 9                    | 25            |

Table S4 The overlap of candidate driver lncRNAs identified by MiTranscriptome and our method.

| Cancer types | MiTranscriptome | Our results | Overlap | P value  |
|--------------|-----------------|-------------|---------|----------|
| HNSC         | 382             | 27          | 3       | 3.72e-02 |
| LUSC         | 497             | 48          | 9       | 4.37e-05 |
| LUAD         | 481             | 69          | 7       | 9.76e-03 |
| PRAD         | 412             | 45          | 6       | 2.02e-03 |
| STAD         | 64              | 7           | 1       | 3.19e-02 |
| BRCA         | 521             | 88          | 5       | 2.36e-01 |
| Total        | 1577            | 238         | 71      | 6.28e-15 |

Table S5 The overlap of candidate driver lncRNAs identified by CRISPRi and our method.

| Cancer types | CRISPRi | Our results | Overlap | P value  |
|--------------|---------|-------------|---------|----------|
| BRCA         | 55      | 88          | 3       | 5.10e-03 |
| GBM          | 37      | 14          | 0       | 1.0e-00  |
| Total        | 286     | 378         | 27      | 1.97e-08 |

Table S6 Cox proportional hazards models of driver lncRNAs across cancers. # indicated not significant.

| Overall Survival Analysis             |          |              |                       |              |
|---------------------------------------|----------|--------------|-----------------------|--------------|
| Univariate Analysis                   |          |              | Multivariate Analysis |              |
| Ensembl ID                            | P value  | Hazard ratio | P value               | Hazard ratio |
| head and neck squamous cell carcinoma |          |              |                       |              |
| ENSG00000246889                       | 2.50E-02 | 1.11         | 3.50E-02              | 1.11         |
| ENSG00000254604                       | 2.90E-02 | 1.11         | 3.80E-02              | 1.10         |
| ENSG00000254605                       | 1.90E-02 | 1.12         | 3.00E-02              | 1.11         |
| lung adenocarcinoma                   |          |              |                       |              |
| ENSG00000246695                       | 2.60E-02 | 1.36         | #                     | #            |
| ENSG00000256894                       | 1.90E-02 | 1.37         | 4.40E-02              | 1.33         |
| ovarian serous cystadenocarcinoma     |          |              |                       |              |
| ENSG00000254024                       | 1.07E-02 | 1.18         | 7.18E-03              | 1.19         |
| ENSG00000226686                       | 1.89E-04 | 1.26         | 1.70E-03              | 1.22         |
| ENSG00000267254                       | 4.66E-03 | 1.20         | 2.08E-02              | 1.16         |
| ENSG00000267470                       | 2.30E-03 | 1.19         | 9.57E-03              | 1.16         |
| ENSG00000246263                       | 7.42E-03 | 1.20         | 6.70E-03              | 1.20         |
| ENSG00000236144                       | 1.38E-03 | 1.23         | 2.45E-03              | 1.22         |
| ENSG00000247081                       | 1.76E-03 | 1.23         | 9.50E-04              | 1.24         |
| ENSG00000260708                       | 2.21E-02 | 1.31         | 3.77E-02              | 1.28         |
| ENSG00000267014                       | 5.05E-03 | 1.16         | 1.82E-02              | 1.13         |
| ENSG00000225975                       | 2.87E-03 | 1.21         | 1.18E-02              | 1.18         |
| ENSG00000261824                       | 8.56E-04 | 1.24         | 5.96E-03              | 1.19         |
| ENSG00000267213                       | 1.44E-02 | 1.15         | 1.33E-02              | 1.15         |
| ENSG00000266935                       | 1.47E-03 | 1.22         | 6.63E-03              | 1.19         |
| ENSG00000267053                       | 2.95E-03 | 1.22         | 1.00E-02              | 1.20         |
| ENSG00000267439                       | 3.95E-05 | 1.31         | 1.15E-04              | 1.29         |

|                 |          |      |          |      |
|-----------------|----------|------|----------|------|
| ENSG00000267575 | 3.59E-04 | 1.24 | 3.49E-03 | 1.19 |
| ENSG00000232677 | 2.95E-03 | 1.22 | 1.00E-02 | 1.20 |
| ENSG00000180458 | 2.99E-03 | 1.19 | 1.23E-02 | 1.16 |
| ENSG00000233527 | 3.66E-03 | 1.20 | 1.48E-02 | 1.17 |
| ENSG00000251136 | 3.51E-04 | 1.32 | 7.56E-05 | 1.36 |
| ENSG00000260032 | 4.77E-03 | 1.26 | #        | #    |
| ENSG00000270127 | 4.47E-03 | 0.76 | 3.41E-02 | 0.81 |
| ENSG00000257084 | 3.69E-02 | 1.16 | #        | #    |
| ENSG00000261437 | 1.10E-03 | 1.27 | 7.17E-04 | 1.29 |
| ENSG00000205885 | 4.63E-02 | 1.15 | #        | #    |
| ENSG00000253217 | 2.13E-02 | 1.16 | 1.17E-02 | 1.18 |
| ENSG00000256967 | 5.00E-02 | 1.15 | #        | #    |
| ENSG00000253854 | 1.52E-03 | 1.28 | 1.19E-03 | 1.28 |
| ENSG00000259424 | 7.55E-03 | 0.78 | #        | #    |
| ENSG00000259583 | 7.63E-03 | 0.78 | 4.77E-02 | 0.83 |
| ENSG00000232386 | 7.63E-03 | 0.78 | 4.77E-02 | 0.83 |
| ENSG00000267381 | 3.46E-03 | 1.18 | 1.43E-02 | 1.15 |
| ENSG00000266916 | 3.13E-03 | 1.19 | 1.33E-02 | 1.16 |
| ENSG00000250899 | 3.09E-02 | 1.16 | #        | #    |
| ENSG00000177406 | 4.75E-02 | 1.14 | #        | #    |
| ENSG00000266930 | 1.01E-02 | 1.16 | 9.88E-03 | 1.16 |
| ENSG00000253878 | 4.16E-03 | 1.24 | 3.46E-03 | 1.25 |

---

breast invasive carcinoma

|                 |          |      |   |   |
|-----------------|----------|------|---|---|
| ENSG00000228801 | 3.38E-02 | 1.27 | # | # |
| ENSG00000251136 | 1.15E-02 | 1.29 | # | # |

---

brain lower grade glioma

|                 |          |      |          |      |
|-----------------|----------|------|----------|------|
| ENSG00000241764 | 9.74E-03 | 1.74 | #        | #    |
| ENSG00000231856 | 3.22E-03 | 0.39 | 4.59E-02 | 0.46 |
| ENSG00000217576 | 3.19E-03 | 0.39 | 4.54E-02 | 0.46 |
| ENSG00000234418 | 3.51E-02 | 1.55 | #        | #    |
| ENSG00000228031 | 3.18E-02 | 1.52 | #        | #    |
| ENSG00000238099 | 6.57E-03 | 0.39 | #        | #    |
| ENSG00000260917 | 3.33E-16 | 0.12 | 1.55E-09 | 0.16 |
| ENSG00000203497 | 1.11E-16 | 0.11 | 1.02E-07 | 0.18 |
| ENSG00000267289 | 4.37E-02 | 2.66 | #        | #    |
| ENSG00000224138 | 1.75E-02 | 1.64 | #        | #    |
| ENSG00000269386 | 4.24E-02 | 2.67 | #        | #    |
| ENSG00000225559 | 4.42E-02 | 1.48 | #        | #    |
| ENSG00000227869 | 9.61E-03 | 1.75 | #        | #    |

---

lung squamous cell carcinoma

|                 |          |      |          |      |
|-----------------|----------|------|----------|------|
| ENSG00000224046 | 2.38E-02 | 0.66 | 2.28E-02 | 0.64 |
| ENSG00000182165 | 2.64E-02 | 0.67 | 2.57E-02 | 0.65 |

|                                       |          |              |                       |              |
|---------------------------------------|----------|--------------|-----------------------|--------------|
| ENSG00000253414                       | 9.07E-03 | 0.77         | 5.29E-03              | 0.76         |
| ENSG00000264868                       | 1.40E-02 | 0.65         | 1.58E-02              | 0.64         |
| ENSG00000232019                       | 1.88E-02 | 0.66         | 2.17E-02              | 0.65         |
| ENSG00000242687                       | 2.82E-02 | 0.68         | 2.94E-02              | 0.67         |
| glioblastoma multiforme               |          |              |                       |              |
| ENSG00000234707                       | 1.15E-02 | 1.08         | #                     | #            |
| Disease Free Survival Analysis        |          |              |                       |              |
| Univariate Analysis                   |          |              | Multivariate Analysis |              |
| Ensembl ID                            | P value  | Hazard ratio | P value               | Hazard ratio |
| head and neck squamous cell carcinoma |          |              |                       |              |
| ENSG00000255310                       | 3.80E-02 | 0.57         | 2.50E-02              | 0.53         |
| ENSG00000269918                       | 3.80E-02 | 0.57         | 2.50E-02              | 0.53         |
| ENSG00000246089                       | 2.70E-02 | 0.54         | 1.70E-02              | 0.51         |
| ovarian serous cystadenocarcinoma     |          |              |                       |              |
| ENSG00000247081                       | 3.20E-03 | 1.21         | 9.31E-03              | 1.18         |
| ENSG00000254353                       | 8.50E-03 | 1.47         | 1.45E-02              | 1.44         |
| ENSG00000267213                       | 4.46E-02 | 1.13         | 1.45E-02              | 1.16         |
| ENSG00000269983                       | 8.50E-03 | 1.47         | 1.45E-02              | 1.44         |
| ENSG00000251136                       | 2.70E-03 | 1.26         | 3.73E-03              | 1.24         |
| ENSG00000260032                       | 2.54E-04 | 1.36         | 7.63E-03              | 1.27         |
| ENSG00000270127                       | 1.88E-02 | 0.81         | #                     | #            |
| ENSG00000270017                       | 3.55E-02 | 0.82         | #                     | #            |
| ENSG00000261437                       | 5.26E-03 | 1.23         | 1.60E-02              | 1.19         |
| ENSG00000253854                       | 1.06E-02 | 1.22         | 2.65E-02              | 1.18         |
| ENSG00000259424                       | 1.91E-02 | 0.81         | #                     | #            |
| ENSG00000259583                       | 3.51E-02 | 0.83         | #                     | #            |
| ENSG00000232386                       | 3.51E-02 | 0.83         | #                     | #            |
| ENSG00000242622                       | 4.04E-02 | 1.24         | #                     | #            |
| ENSG00000232453                       | 2.40E-02 | 1.33         | 1.86E-02              | 1.35         |
| ENSG00000253878                       | 3.02E-02 | 1.17         | #                     | #            |
| brain lower grade glioma              |          |              |                       |              |
| ENSG00000241764                       | 8.38E-06 | 2.15         | 3.37E-04              | 1.95         |
| ENSG00000234418                       | 4.81E-06 | 2.20         | 1.96E-04              | 2.01         |
| ENSG00000228031                       | 1.14E-05 | 2.11         | 7.00E-04              | 1.89         |
| ENSG00000238099                       | 6.43E-03 | 0.41         | #                     | #            |
| ENSG00000204934                       | 9.09E-06 | 2.17         | 1.33E-04              | 2.05         |
| ENSG00000260917                       | 2.21E-11 | 0.20         | 7.94E-08              | 0.24         |
| ENSG00000261342                       | 3.04E-02 | 2.45         | #                     | #            |
| ENSG00000203497                       | 0.00E+00 | 0.13         | 5.51E-11              | 0.17         |
| ENSG00000267299                       | 3.99E-02 | 2.54         | #                     | #            |

|                              |          |      |          |      |
|------------------------------|----------|------|----------|------|
| ENSG00000267289              | 3.42E-02 | 2.61 | #        | #    |
| ENSG00000270157              | 1.35E-05 | 2.10 | 4.50E-04 | 1.93 |
| ENSG00000224138              | 2.94E-06 | 2.24 | 2.64E-04 | 1.99 |
| ENSG00000269386              | 3.78E-02 | 2.57 | #        | #    |
| ENSG00000261455              | 4.74E-06 | 2.21 | 1.45E-04 | 2.04 |
| ENSG00000182648              | 2.60E-06 | 2.23 | #        | #    |
| ENSG00000228775              | 1.35E-05 | 2.10 | 4.50E-04 | 1.93 |
| ENSG00000225559              | 6.75E-06 | 2.14 | 4.37E-04 | 1.93 |
| ENSG00000240449              | 9.09E-06 | 2.17 | 1.33E-04 | 2.05 |
| ENSG00000227869              | 8.18E-06 | 2.18 | 3.78E-04 | 1.96 |
| ENSG00000260231              | 1.38E-05 | 2.10 | 4.72E-04 | 1.93 |
| ENSG00000239377              | 9.09E-06 | 2.17 | 1.33E-04 | 2.05 |
| lung squamous cell carcinoma |          |      |          |      |
| ENSG00000253414              | 8.37E-03 | 0.71 | 3.52E-03 | 0.68 |
| ENSG00000265943              | 2.10E-04 | 1.89 | 5.26E-04 | 1.85 |
| ENSG00000266729              | 6.75E-03 | 1.64 | 6.10E-03 | 1.66 |
| ENSG00000246889              | 2.32E-02 | 1.18 | #        | #    |
| ENSG00000244124              | 1.78E-02 | 0.71 | 2.57E-02 | 0.72 |
| ENSG00000248932              | 5.72E-03 | 0.64 | 8.98E-03 | 0.65 |

Table S7 Univariate and multivariate Cox proportional hazards analysis of disease free survival for 429 brain lower grade glioma patients according to AC000123.4 copy number status.

| Subgroup                              | Univariate Analysis   |          | Multivariate Analysis |          |
|---------------------------------------|-----------------------|----------|-----------------------|----------|
|                                       | Hazard ratio (95% CI) | P value  | Hazard ratio (95% CI) | P value  |
| All patients (N=429)                  |                       |          |                       |          |
| Age, modeled as a continuous variable | 1.02(1.01-1.04)       | 1.52e-03 | 1.02(1.01-1.03)       | 7.43e-03 |
| Gender                                |                       |          |                       |          |
| Male vs. Female                       | 0.85(0.61-1.20)       | 0.36     | 0.84(0.60-1.19)       | 0.33     |
| Histological diagnosis                |                       |          |                       |          |
| Oligoastrocytoma vs. Astrocytoma      | 0.56(0.35-0.89)       | 1.35e-02 | 0.56(0.35-0.88)       | 1.32e-02 |
| Oligodendroglioma vs. Astrocytoma     | 0.64(0.44-0.94)       | 2.15e-02 | 0.66(0.45-0.99)       | 4.39e-02 |

|                        |                 |          |                 |          |
|------------------------|-----------------|----------|-----------------|----------|
| Grade                  |                 |          |                 |          |
| G3 vs. G2              | 1.55(1.10-2.18) | 1.31e-02 | 1.40(0.98-2.00) | 6.76e-02 |
| Continuous copy number |                 |          |                 |          |
| AC000123.4             | 2.12(1.49-3.02) | 3.06e-05 | 1.99(1.38-2.88) | 2.44e-04 |

(Abbreviations: CI, confidence interval.)

Table S8 Univariate and multivariate Cox proportional hazards analysis of disease free survival for 429 brain lower grade glioma patients according to AC000123.4 expression levels.

| Subgroup                              | Univariate Analysis   |          | Multivariate Analysis |          |
|---------------------------------------|-----------------------|----------|-----------------------|----------|
|                                       | Hazard ratio (95% CI) | P value  | Hazard ratio (95% CI) | P value  |
| All patients (N=429)                  |                       |          |                       |          |
| Age, modeled as a continuous variable | 1.02(1.01-1.04)       | 1.42e-03 | 1.02(1.01-1.04)       | 9.76e-04 |
| Gender                                |                       |          |                       |          |
| Male vs. Female                       | 0.84(0.60-1.18)       | 0.32     | 0.83(0.59-1.17)       | 0.29     |
| Histological diagnosis                |                       |          |                       |          |
| Oligoastrocytoma vs. Astrocytoma      | 0.57(0.36-0.90)       | 1.58e-02 | 0.71(0.44-1.14)       | 0.15     |
| Oligodendroglioma vs. Astrocytoma     | 0.65(0.45-0.95)       | 2.73e-02 | 0.73(0.48-1.10)       | 0.13     |
| Grade                                 |                       |          |                       |          |
| G3 vs. G2                             | 1.54(1.09-2.17)       | 1.47e-02 | 1.30(0.90-1.87)       | 0.16     |
| Continuous expression                 |                       |          |                       |          |
| AC000123.4                            | 4.41(2.46-7.80)       | 5.92e-07 | 3.46(1.92-6.22)       | 3.44e-05 |

(Abbreviations: CI, confidence interval.)

Table S9 Univariate and multivariate Cox proportional hazards analysis of disease free survival for 399 brain lower grade glioma patients without EGFR amplification according to AC000123.4 copy number status.

| Subgroup | Univariate Analysis | Multivariate Analysis |
|----------|---------------------|-----------------------|
|----------|---------------------|-----------------------|

|                                       | Hazard ratio (95% CI) | P value | Hazard ratio (95% CI) | P value |
|---------------------------------------|-----------------------|---------|-----------------------|---------|
| All patients (N=399)                  |                       |         |                       |         |
| Age, modeled as a continuous variable | 1.01(1-1.02)          | 0.04    | 1.01(0.99-1.02)       | 0.06    |
| Gender                                |                       |         |                       |         |
| Male vs. Female                       | 0.84(0.59-1.19)       | 0.34    | 0.83(0.59-1.18)       | 0.30    |
| Histological diagnosis                |                       |         |                       |         |
| Oligoastrocytoma vs. Astrocytoma      | 0.51 (0.31-0.83)      | 0.007   | 0.47(0.29-0.77)       | 0.002   |
| Oligodendroglioma vs. Astrocytoma     | 0.70(0.48-1.03)       | 0.071   | 0.65(0.44-0.96)       | 0.03    |
| Continuous copy number                |                       |         |                       |         |
| AC000123.4                            | 1.86(1.26-2.76)       | 0.0018  | 1.91 (1.27-2.86 )     | 0.0017  |

(Abbreviations: CI, confidence interval.)

Table S10 The miRNAs from miRBase v22 that located in the genomic regions of candidate driver lncRNAs.

| Pri-miRNA    | miRNA           | Driver miRNA evidence            | LncRNA name | Driver lncRNA evidence     | Cancer type    |
|--------------|-----------------|----------------------------------|-------------|----------------------------|----------------|
| hsa-mir-31   | hsa-miR-31-3p,  | PMID: 22264793; 19524507;        | MIR31HG     | PMID:25908244; 28639619;   | LUSC           |
|              | hsa-miR-31-5p   | 29051494; 24582497               |             | 27334046; 26549028         |                |
| hsa-mir-570  | hsa-miR-570-3p, | PMID:29874097;26084609;          | LINC00969   |                            | HNSC           |
|              | hsa-miR-570-5p  | 29795113                         |             |                            |                |
| hsa-mir-1204 | hsa-mir-1204    | PMID:29555976;25756509;          | PVT1        | PMID:26481356;23175614;    | HNSC, LUAD, OV |
|              |                 | 22110125; 18314482               |             | 25043044;29752292;29731168 |                |
| hsa-mir-1205 | hsa-mir-1205    | PMID:29852168;                   | PVT1        | PMID:26481356;23175614;    | HNSC, LUAD, OV |
|              |                 | doi:10.1158/1538-7445.AM2015-187 |             | 25043044;29752292;29731168 |                |
| hsa-mir-1206 | hsa-miR-1206    | PMID:28628559;23077621           | PVT1        | PMID:26481356;23175614;    | HNSC, LUAD, OV |



|                |                  |                         |            |                            |                |
|----------------|------------------|-------------------------|------------|----------------------------|----------------|
|                |                  |                         |            | 25043044;29752292;29731168 |                |
| hsa-mir-1207   | hsa-miR-1207-3p, | PMID:28235236;26337084; | PVT1       | PMID:26481356;23175614;    | HNSC, LUAD, OV |
|                | hsa-miR-1207-5p  | 29387230; 27852979      |            | 25043044;29752292;29731168 |                |
| hsa-mir-200c   | hsa-miR-200c-3p, | PMID:20579395;17804704; | U47924.29  |                            | OV,BRCA        |
|                | hsa-miR-200c-5p  | 28436968; 19665978      |            |                            |                |
| hsa-mir-141    | hsa-miR-141-3p,  | PMID:24285464;22479552; | U47924.29  |                            | OV,BRCA        |
|                | hsa-miR-141-5p   | 24000293; 28112170      |            |                            |                |
| hsa-mir-924    | hsa-miR-924      | PMID:29753758;27525335  | LINC00669  |                            | CR             |
| hsa-mir-5583-2 | hsa-miR-5583-5p, |                         | LINC00669  |                            | CR             |
|                | hsa-miR-5583-3p  |                         |            |                            |                |
| hsa-mir-24-2   | hsa-miR-24-3p,   | PMID:25943634;27625395; | MIR24-2    |                            | OV             |
|                | hsa-miR-24-2-5p  | 22911661; 21463514      |            |                            |                |
| hsa-mir-4999   | Has-miR-4999-5p, |                         | RAB11B-AS1 | PMID: 29928484             | LGG            |
|                | hsa-miR-4999-3p  |                         |            |                            |                |

---

## Supplementary Figure legends

Figure S1 The distribution of semantic similarity score between candidate GO terms and hallmark-associated GO terms. Red arrows indicate Rest-similarity score that was calculated between each curated GO term of a certain hallmark and the rest of other curated GO terms of this hallmark.

Figure S2 Heatmaps show enrichment of hallmark-associated PCGs in additional pathways that were downloaded from Synapse (syn1741407). The P-value were calculated using the hypergeometric test.

Figure S3 Construction of mutually exclusive networks from binary copy number alteration profiles. For each pair of genes, a 2x2 contingency table was built to investigate their relationship of CAN. Gene pair g1 and g2 were significantly mutually exclusive by a hypergeometric test ( $p < 0.05$ ). The co-occurrence of gene pair g3 and g4 was never observed in any samples.

Figure S4 The lncRNAs and protein-coding genes in the top 10 most significant wide peak regions in BRCA, HNSC, LUAD, LUSC, PRAD, LGG, STAD, CR, SKCM and OV. The numbers of protein-coding genes (left) and lncRNAs (right) in each peak are indicated in parentheses. Pie chart of each peak shows the proportion of PCG (blue) and lncRNA (green).

Figure S5 The basic statistics of mutually exclusive module across 11 major cancer types. (A) Stacked bars indicate the distribution of module size. (B) Box plot shows frequencies of CNA for PCGs from hallmark-associated mutually exclusive modules (left) and other PCGs (right) (\*:  $p < 0.05$ , permutation test).

Figure S6 The number of predicted lncRNA from real data (red arrow) and random CNAs profiles (left) and expression profiles (right) across 11 cancer types (curve) (\*:  $p < 0.05$ , permutation test).

Figure S7 QQ-plot of p-values that evaluate the hallmark associated function of mutually exclusive modules. The proportion of p-values are shown in the bottom.

Figure S8 The overlap of candidate driver genes with Cancer Gene Census (CGC). Statistical significance is assessed by the hypergeometric test with  $p < 0.05$ .

Figure S9 Proportion of lncRNAs from modules lie within early-replicating regions. (A-C) Bar plots show the difference of the fraction of lncRNAs from modules and other lncRNAs that located in early replicating regions derived from all of the 8 cell lines, IMR90 and MCF-7, respectively. The ME lncRNAs in figures indicate lncRNAs from mutually exclusive modules.

Figure S10 Heatmaps show cancer-associated hallmarks affected by cancer-specific driver lncRNAs.

Figure S11 Heatmap shows cancer-associated hallmarks affected by PVT1 in HNSC, LUAD and OV.

Figure S12 Kaplan–Meier plots of DFS of LGG patients grouped by copy number status of lncRNA AC000123.4. The newly added clinical data was downloaded on 1 July, 2016 from cBioPortal website that includes 35 disease-free patients and 11 disease-progressed patients.

## Supplementary Figures

**Figure S1**

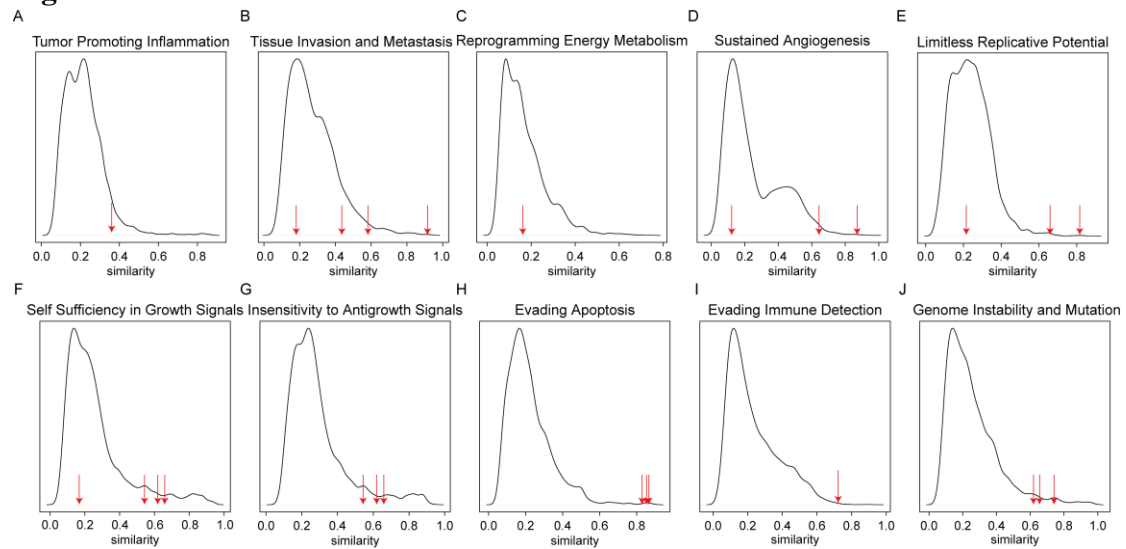

**Figure S2**

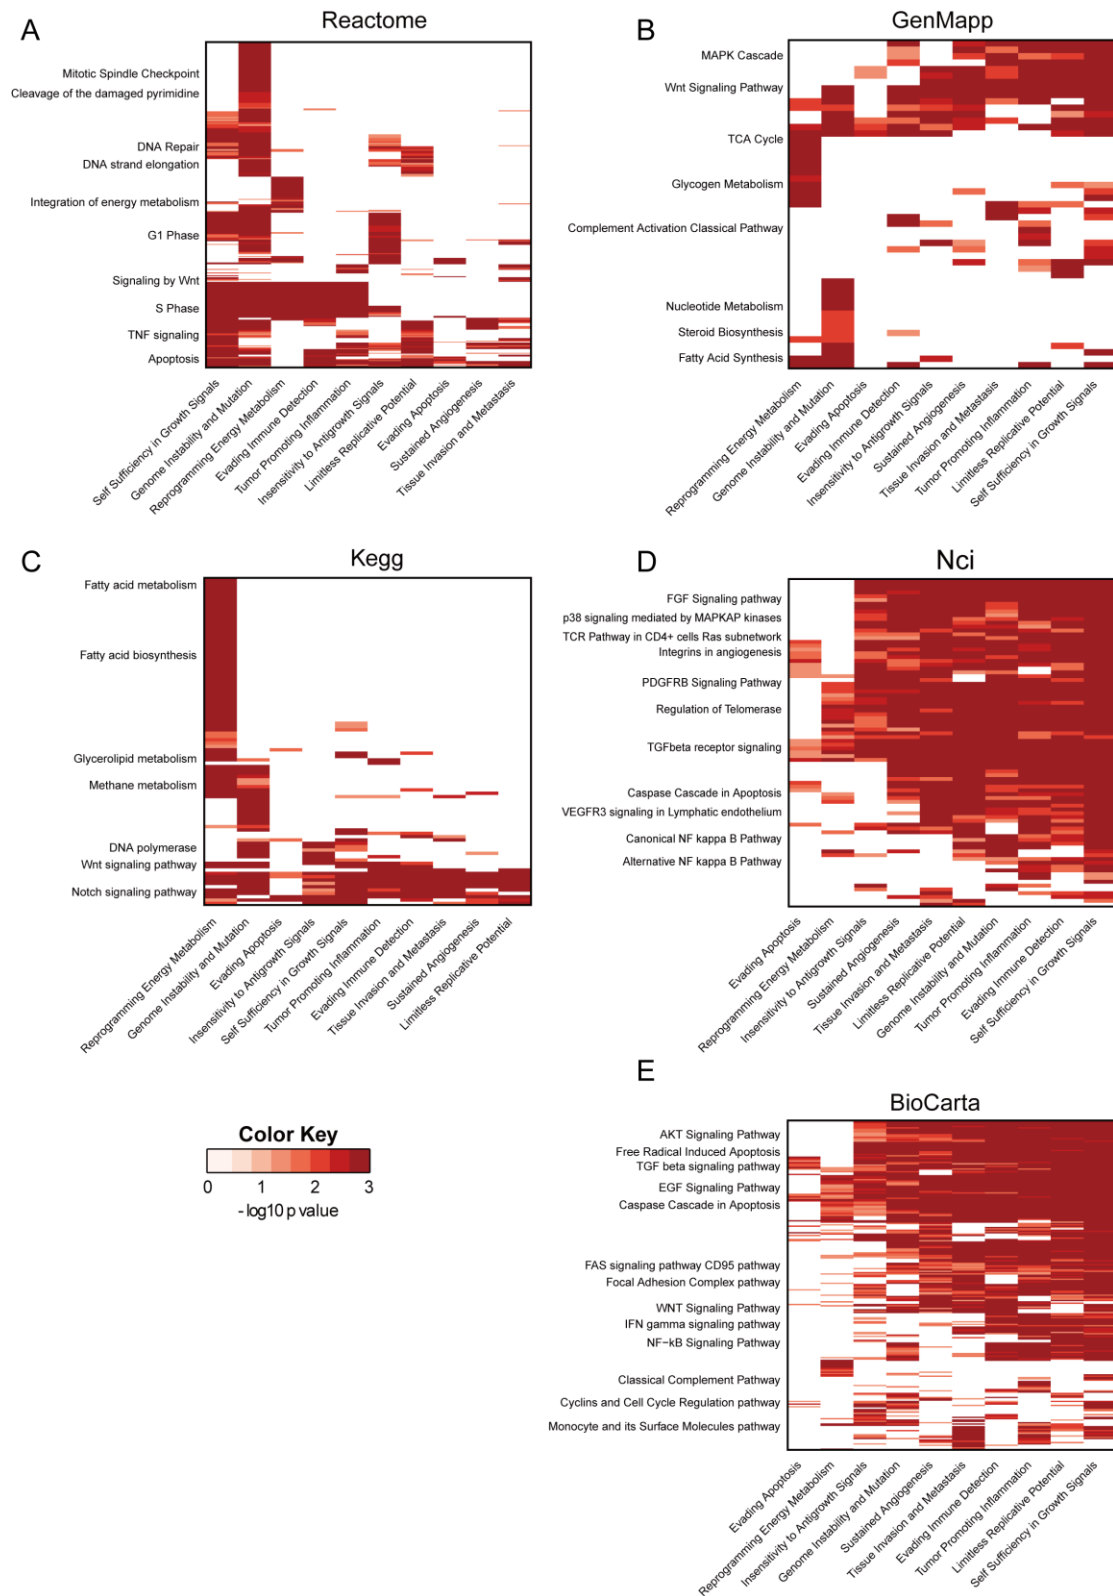

Figure S3

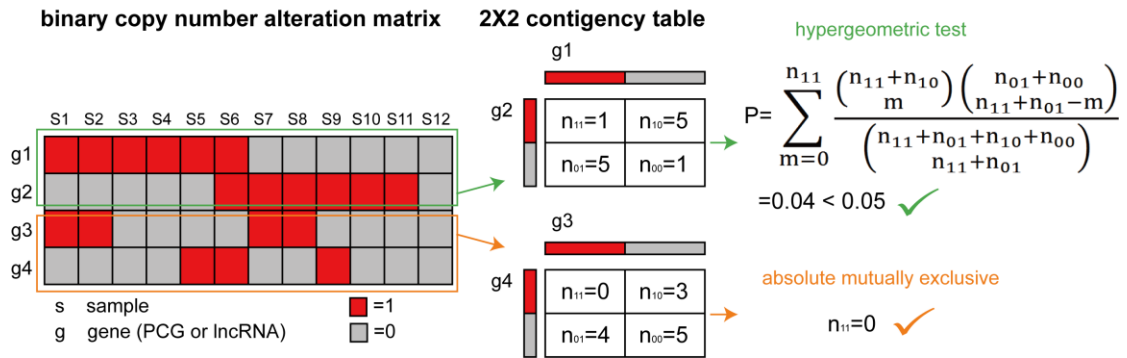

Figure S4

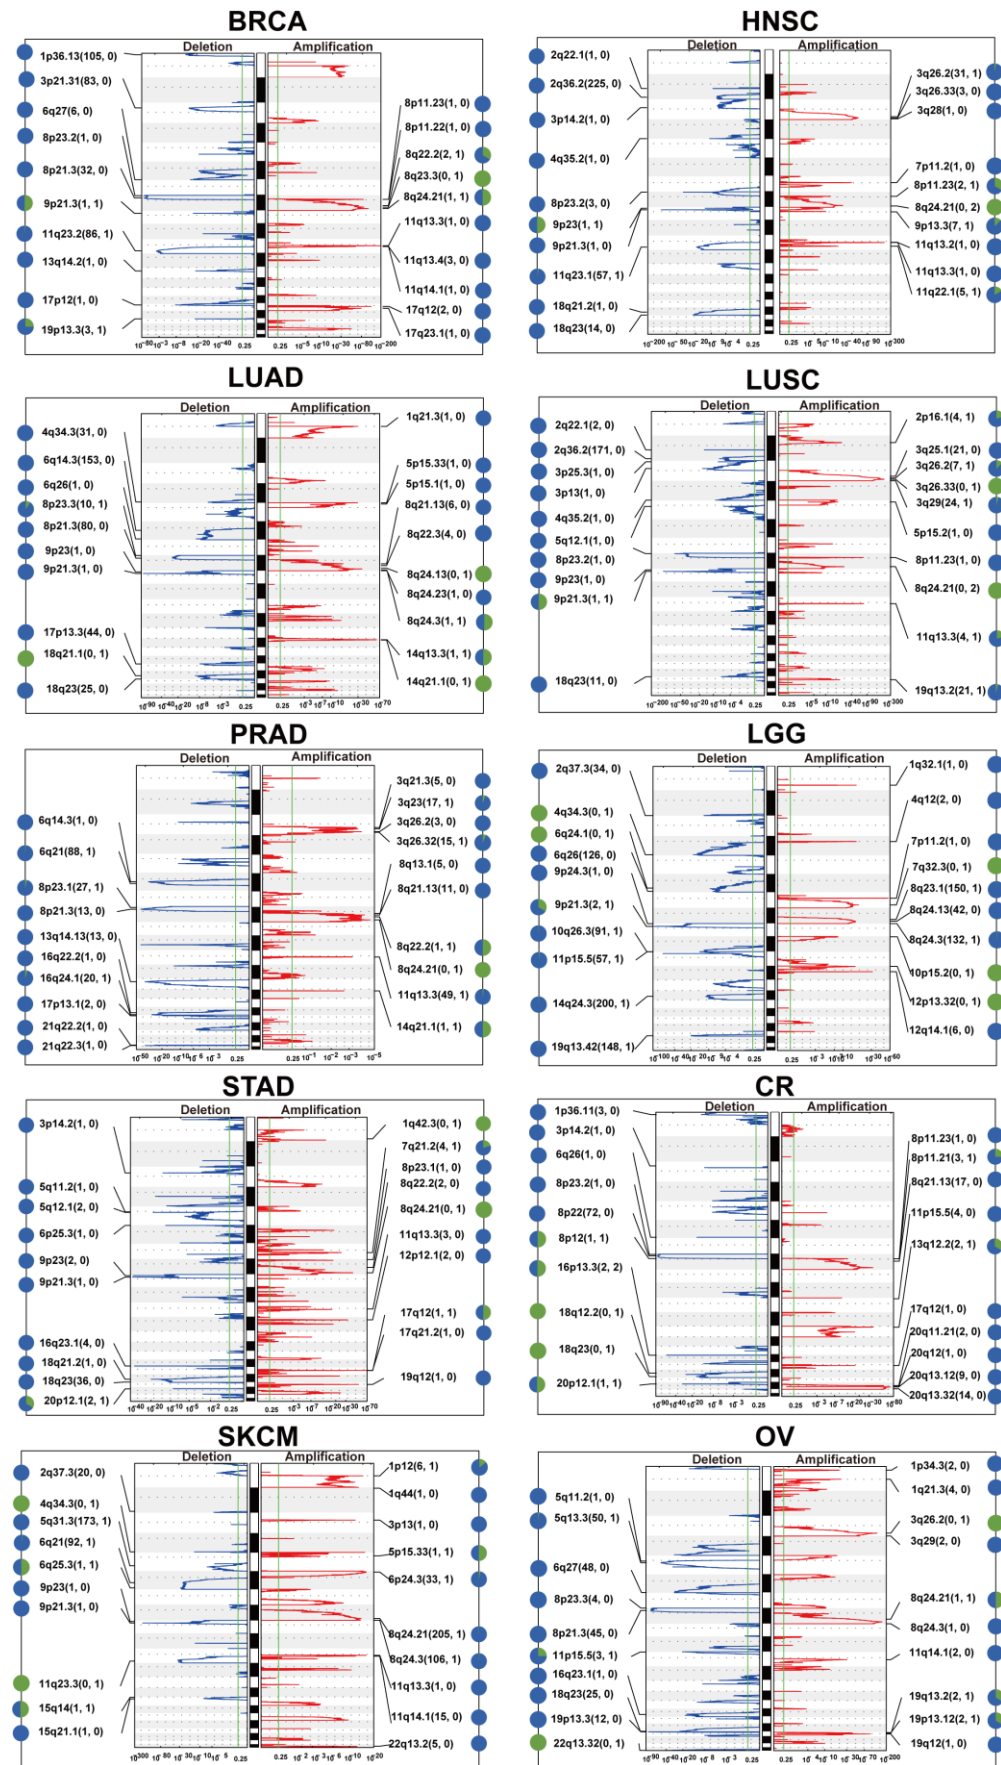

Figure S5

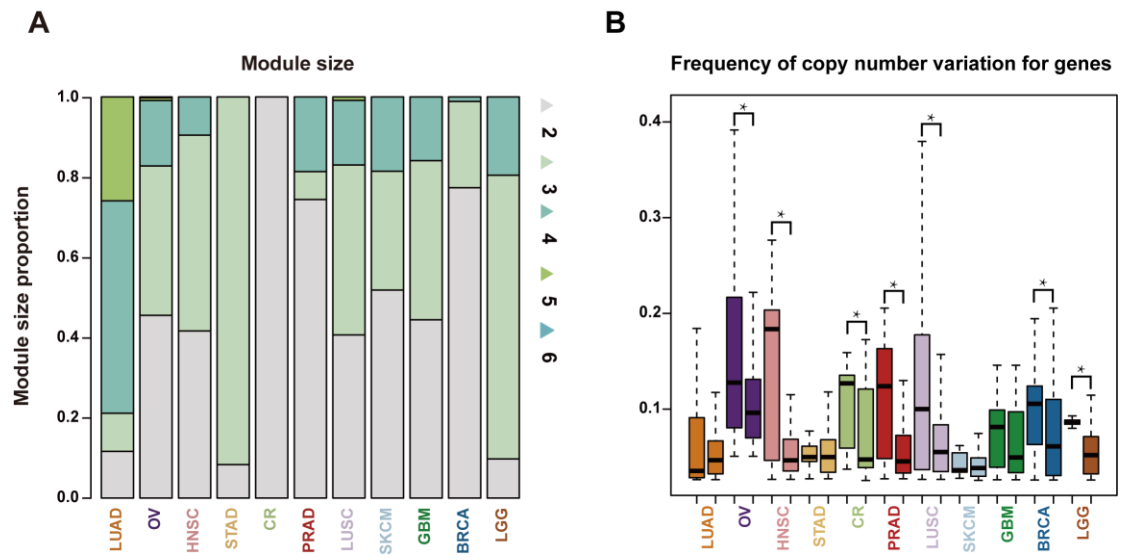

**Figure S6**

**A**

Number of predicted lncRNAs  
from random CNV profiles

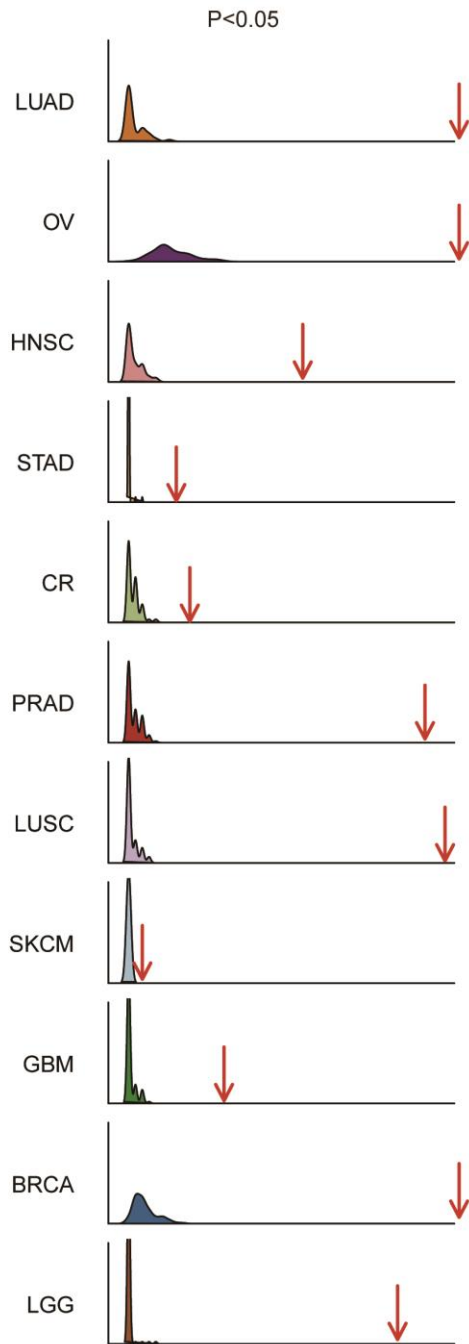

**B**

Number of predicted lncRNAs  
from random expression profiles

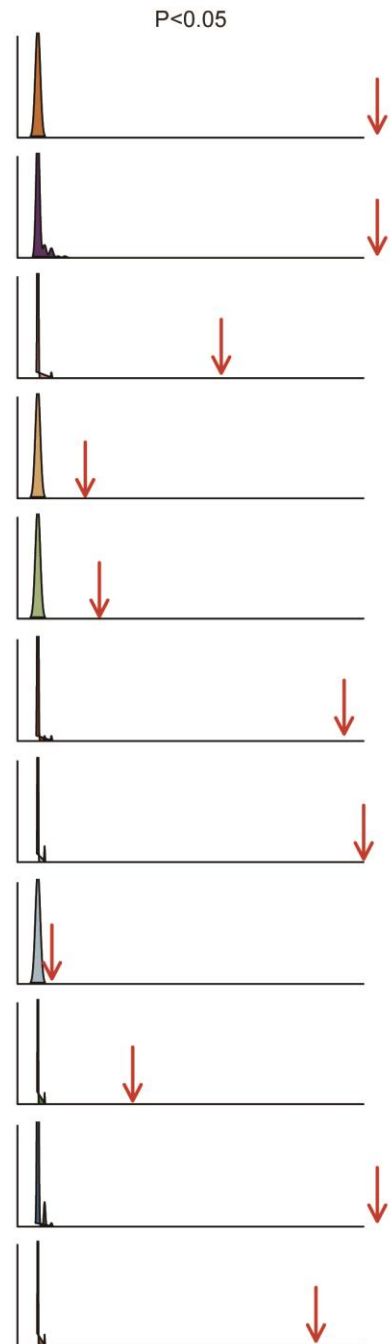



Figure S7

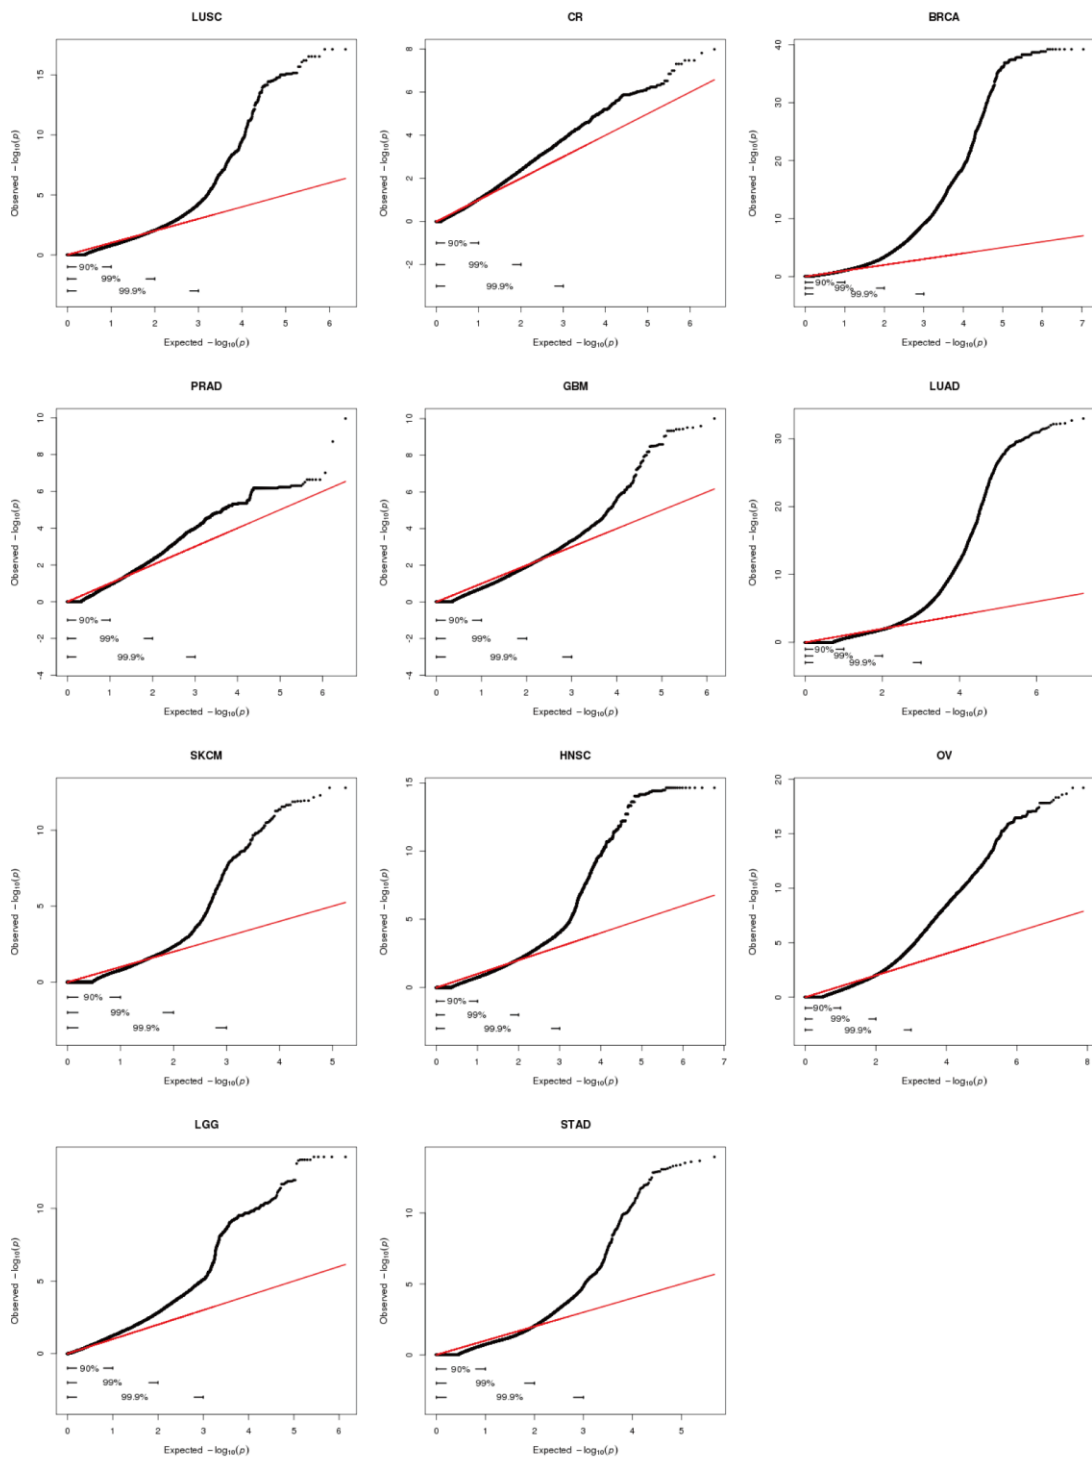

**Figure S8**

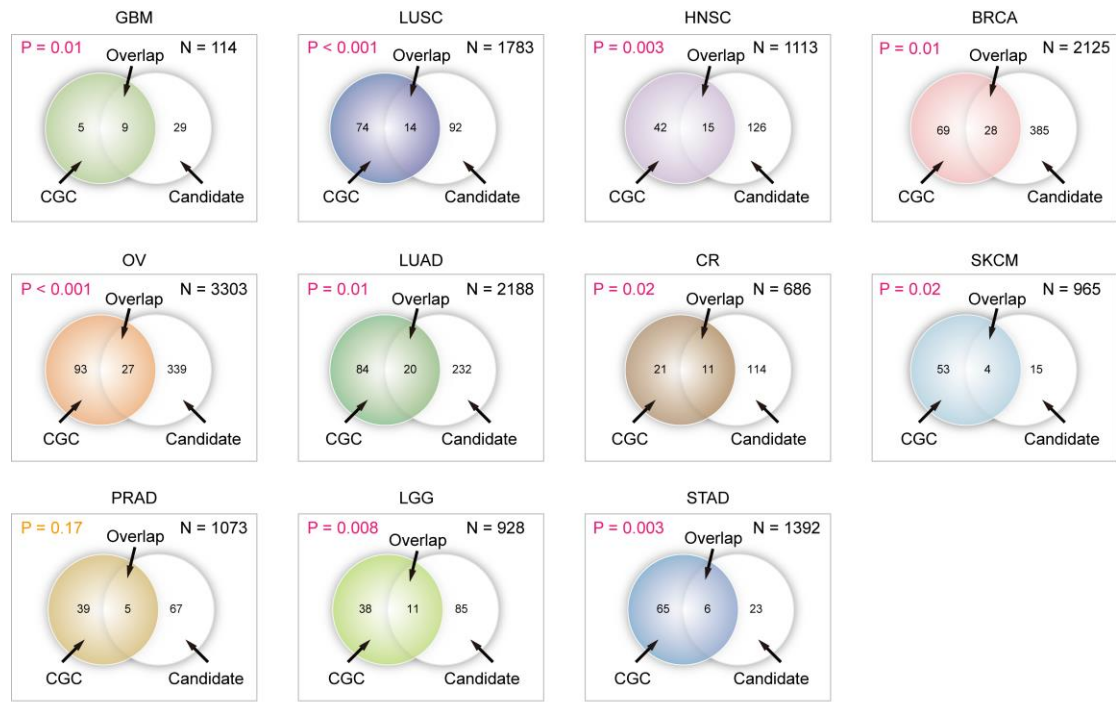

LUAD: lung adenocarcinoma HNSC: head and neck squamous cell carcinoma PRAD: prostate adenocarcinoma LGG: brain lower grade glioma  
 STAD: stomach adenocarcinoma GBM: glioblastoma multiforme LUSC: lung squamous cell carcinoma BRCA: breast invasive carcinoma  
 SKCM: skin cutaneous melanoma OV: ovarian serous cystadenocarcinoma CR: Colon adenocarcinoma&Rectum adenocarcinoma

**Figure S9**

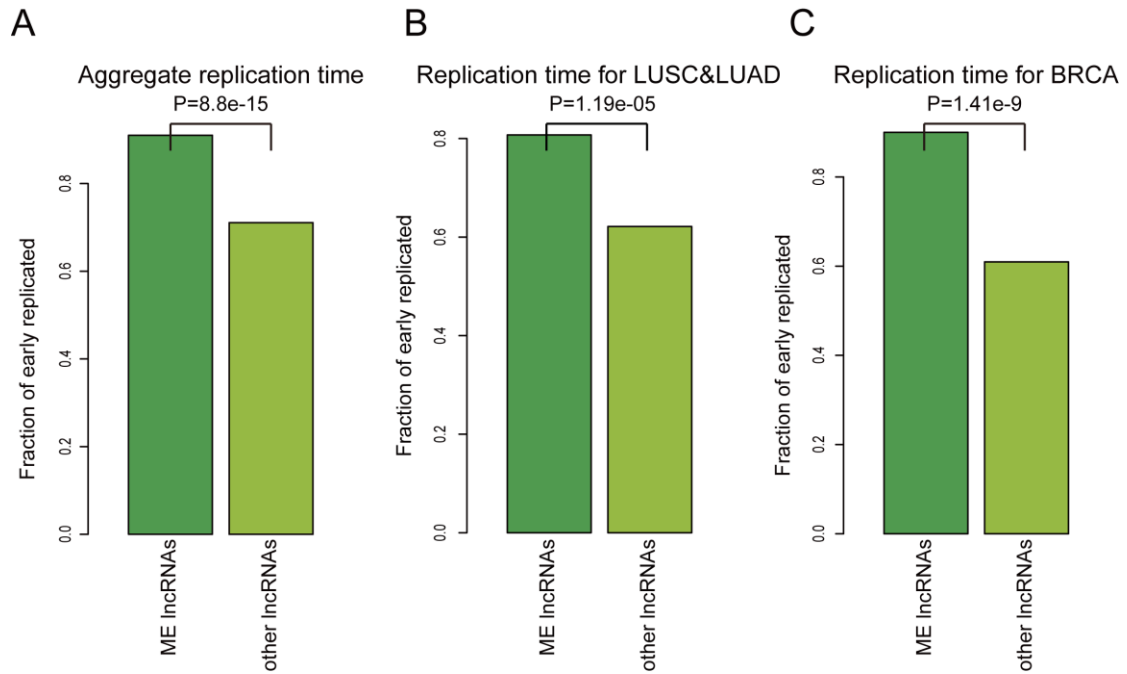



Figure S11

### hallmarks affected by PVT1 across cancers

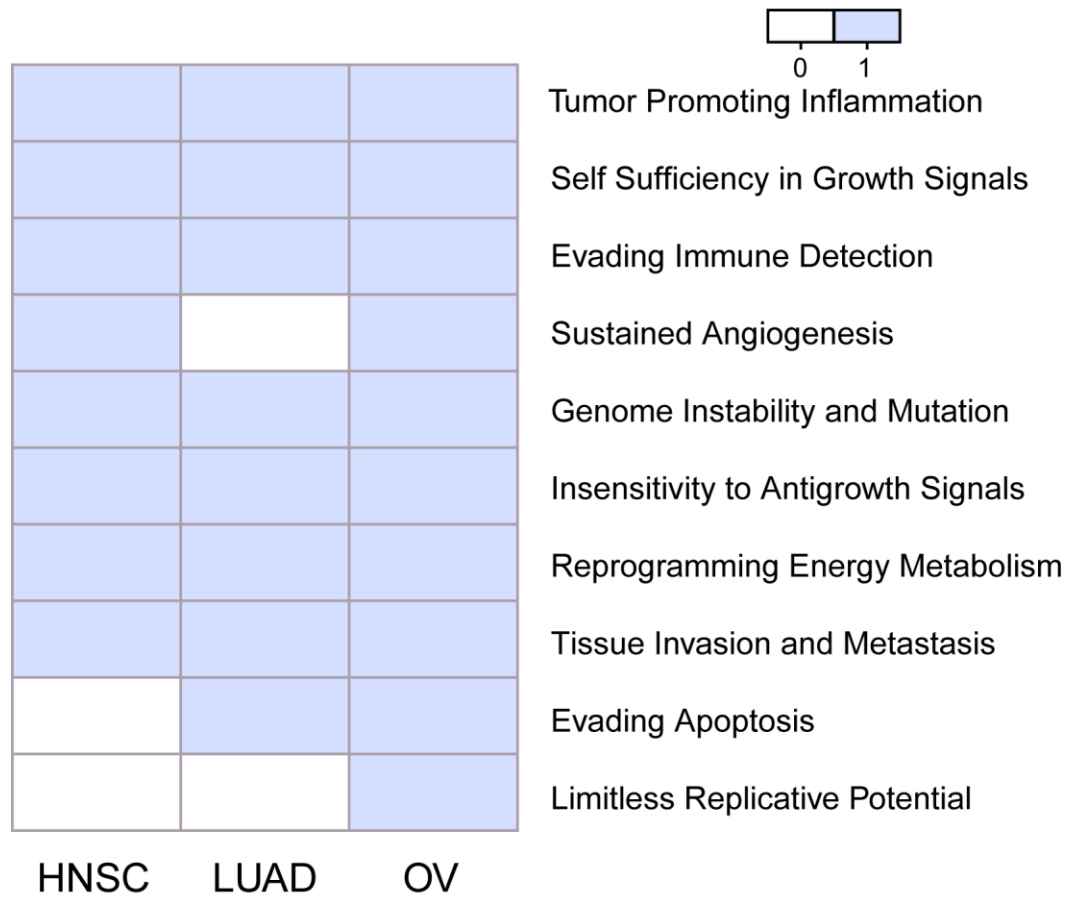

Figure S12

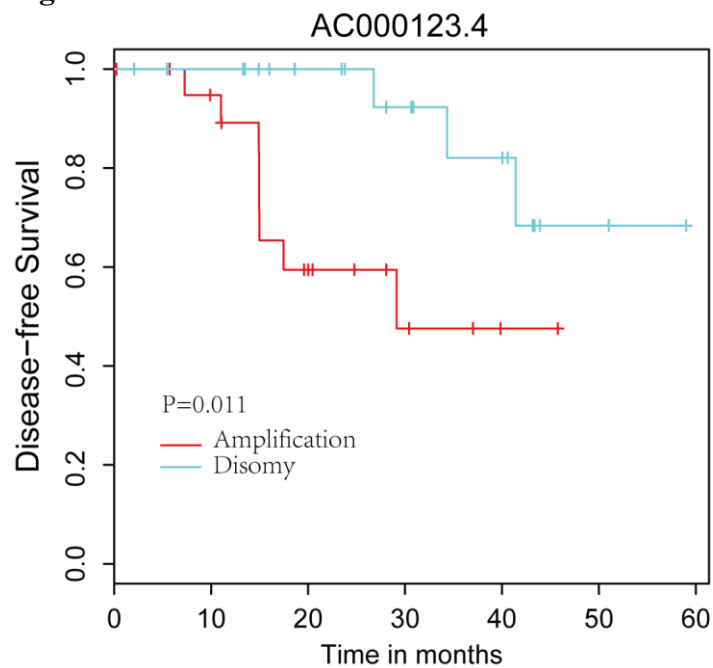

Supplement: MOL2-12-1980-s001.pdf [file MOL2-12-1980-s001.pdf]
